# Supplementary material for: Fe3O4/PANI/MnO2 core–shell hybrids as advanced adsorbents for heavy metal ions
Source: Royal Society of Chemistry journal article supplement (doi:10.1039/c6ta10499a), 2017-01-01
Supplement: c6ta10499a1.pdf [file c6ta10499a1.pdf]

## **Fe<sub>3</sub>O<sub>4</sub>/PANI/MnO<sub>2</sub> Core-Shell Hybrids as Advanced Adsorbents for Heavy Metal Ions**

*Jian Zhang, Jie Han, \* Minggui Wang, Rong Guo\**

School of Chemistry and Chemical Engineering, Yangzhou University, Yangzhou, Jiangsu, 225002,

P. R. China. E-mail: hanjie@yzu.edu.cn; guorong@yzu.edu.cn

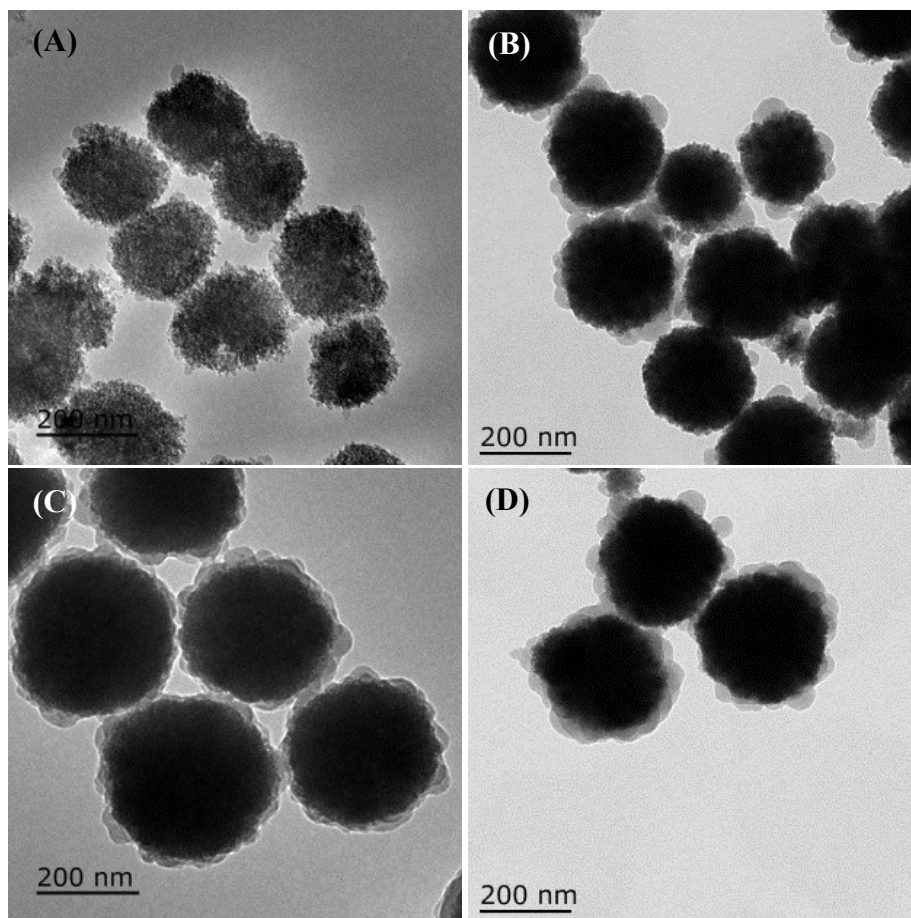

**Figure S1.** TEM images of (A) Fe<sub>3</sub>O<sub>4</sub>/PANI(0.5), (B) Fe<sub>3</sub>O<sub>4</sub>/PANI(1), (C) Fe<sub>3</sub>O<sub>4</sub>/PANI(1.5) and (D) Fe<sub>3</sub>O<sub>4</sub>/PANI(2).

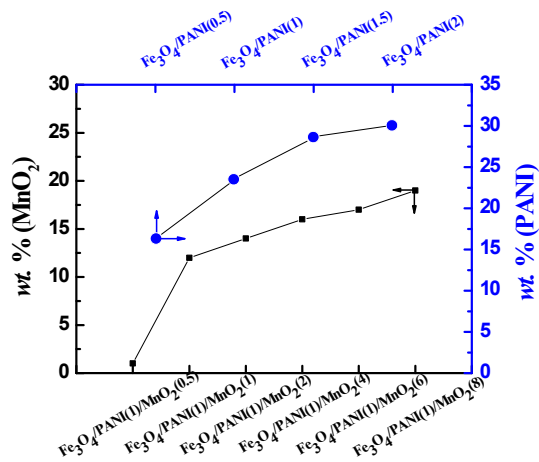

**Figure S2.** The weight percentage of Fe<sub>3</sub>O<sub>4</sub>/PANI and Fe<sub>3</sub>O<sub>4</sub>/PANI/MnO<sub>2</sub> core-shell hybrids as determined from energy dispersive spectroscopy data.

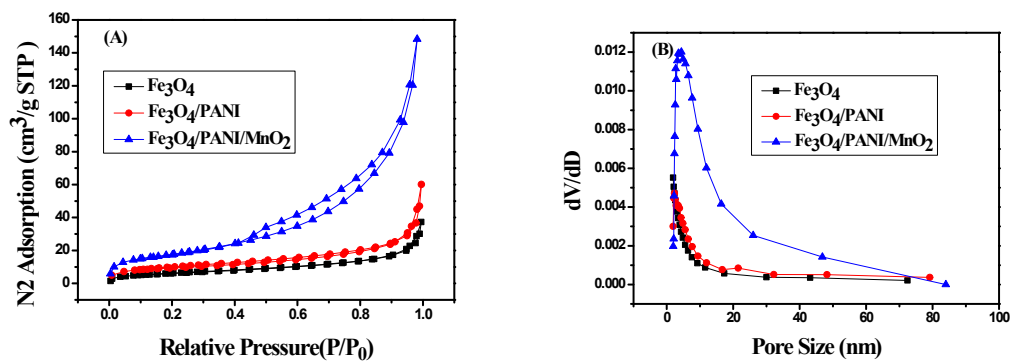

**Figure S3.** (A) N<sub>2</sub> sorption isotherms and (B) pore size distributions of Fe<sub>3</sub>O<sub>4</sub>, Fe<sub>3</sub>O<sub>4</sub>/PANI, and Fe<sub>3</sub>O<sub>4</sub>/PANI/MnO<sub>2</sub>.
